# Supplementary material
Source: publisher figshare collection journal article supplement (https://sage.figshare.com/ndownloader/files/17566367)

**Supplementary Figure 1. Bland altman Plots per formula, for the MS- and HC group.** Black line: mean, small dotted line: 95% CI, large dotted line: Limits of agreement (mean  $\pm$  2SD)

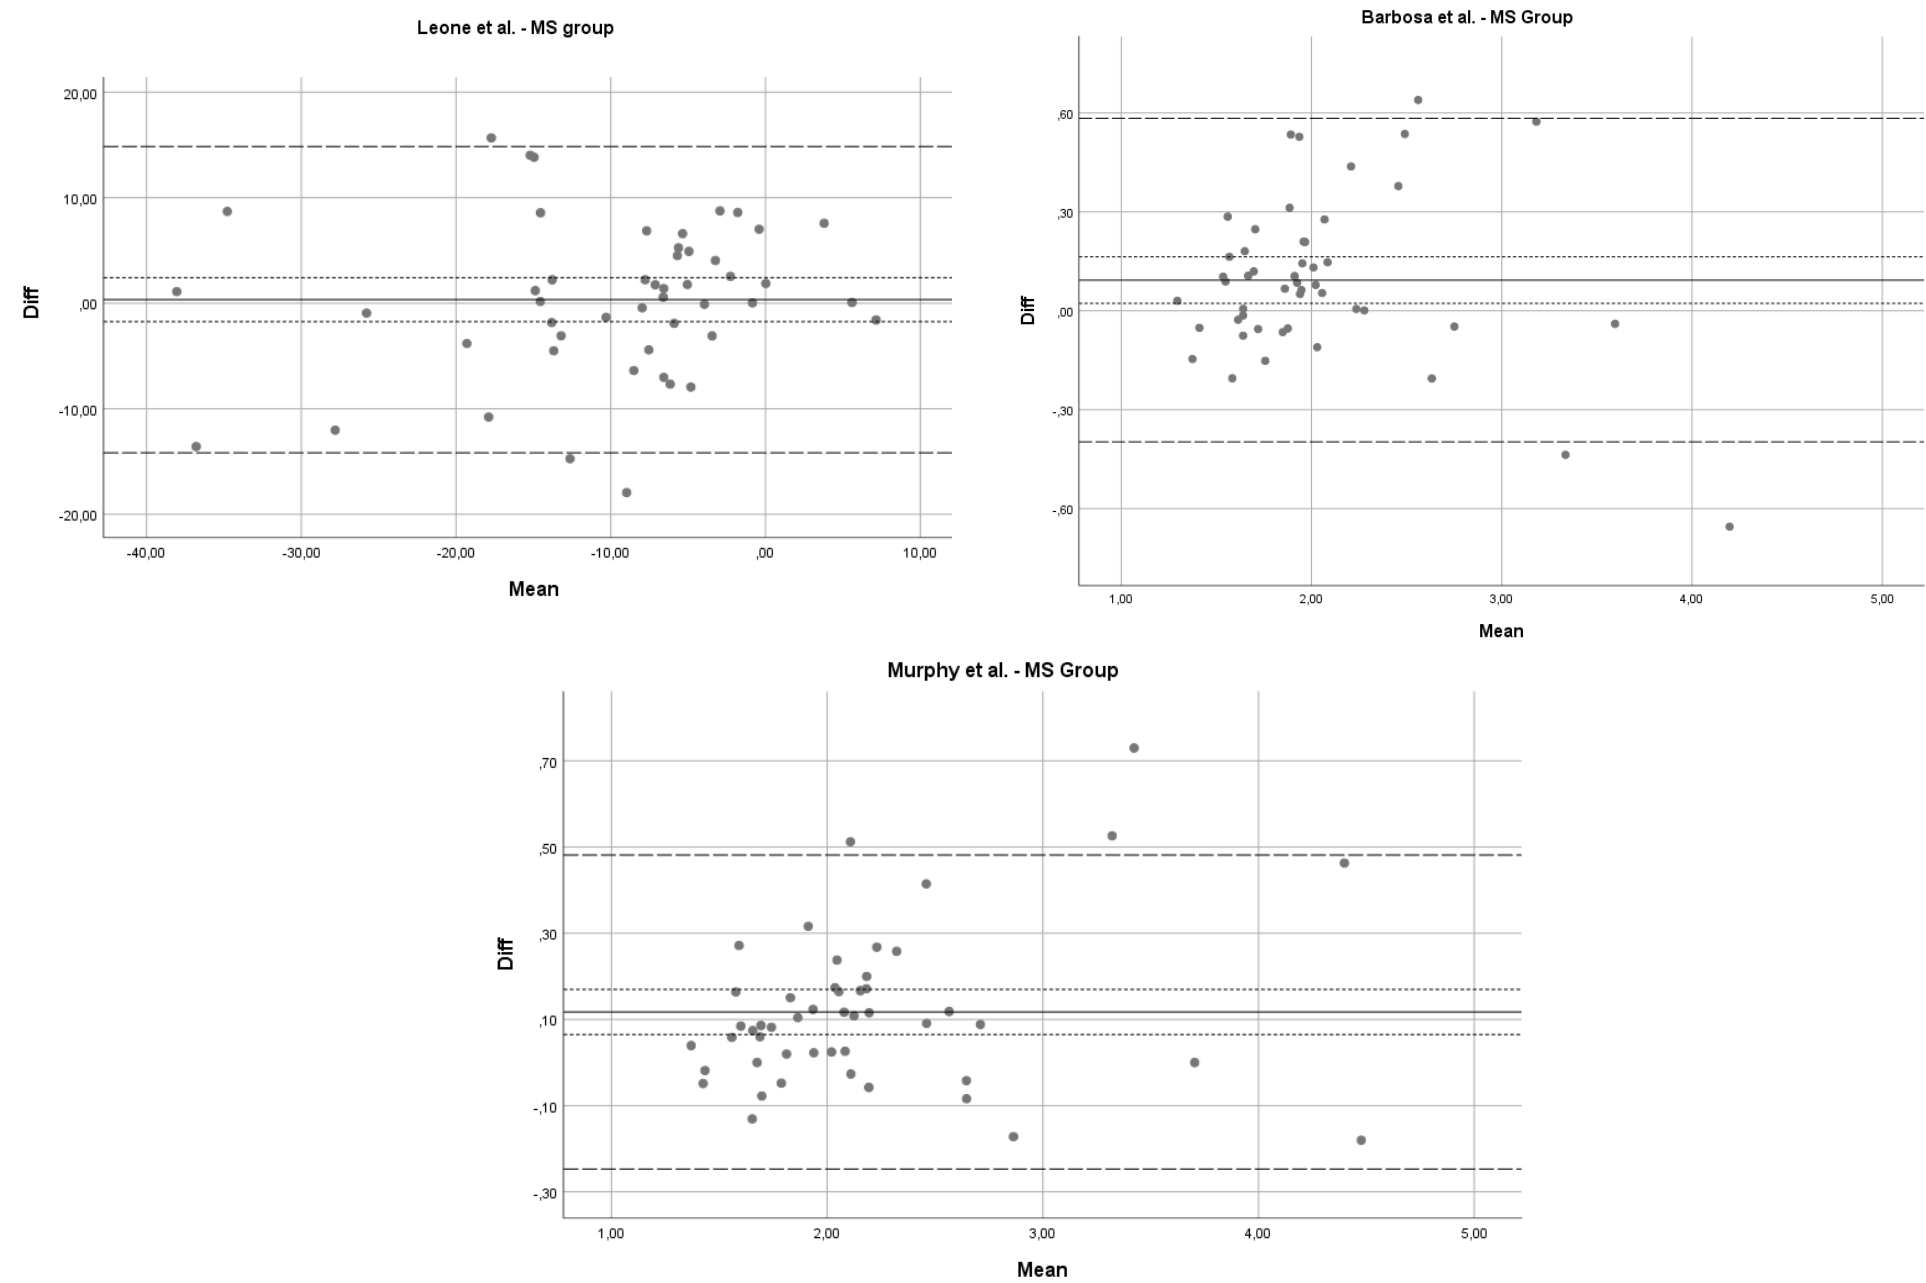

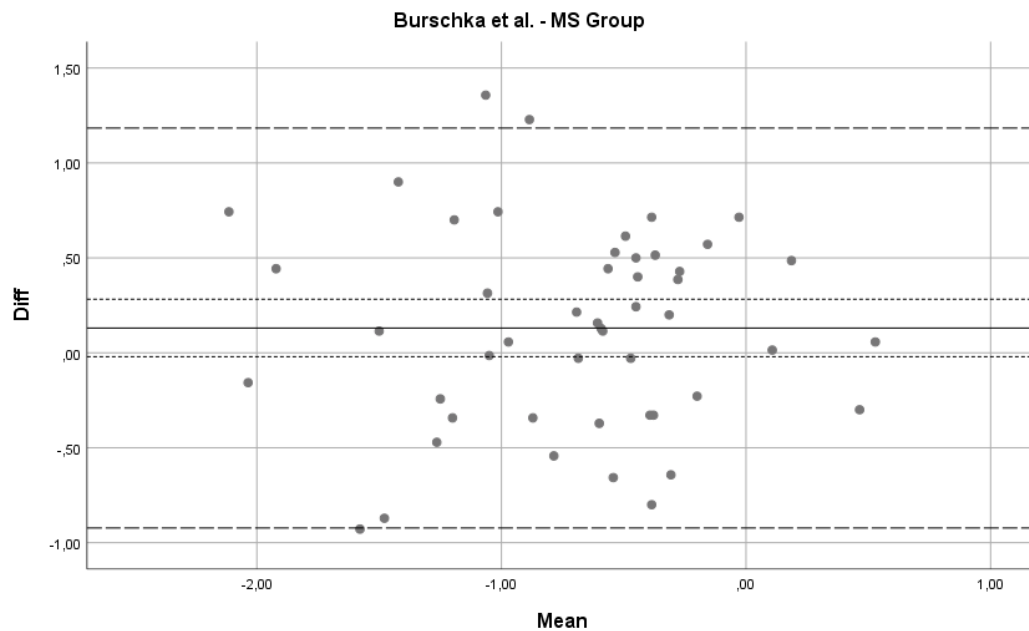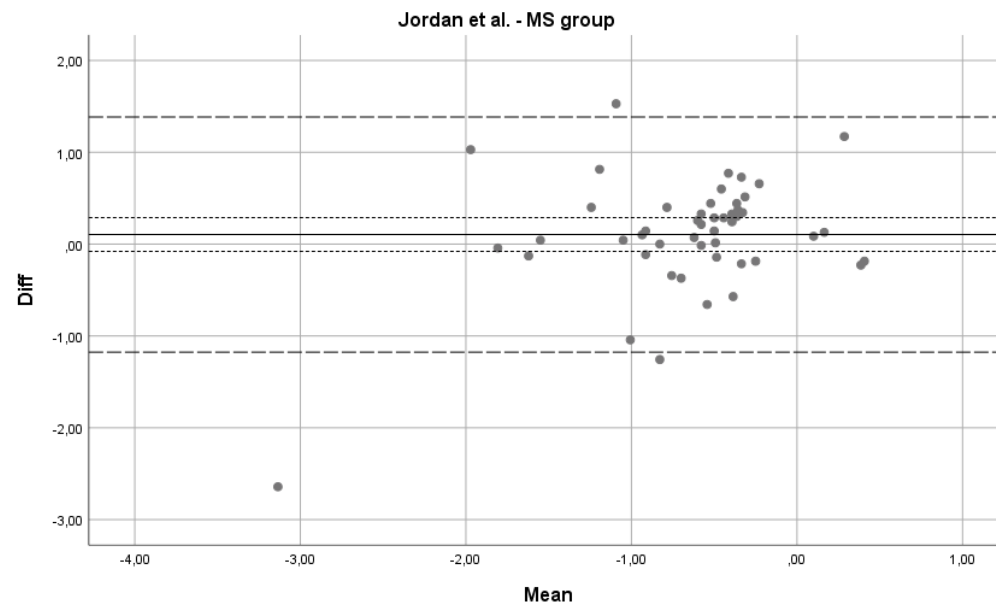

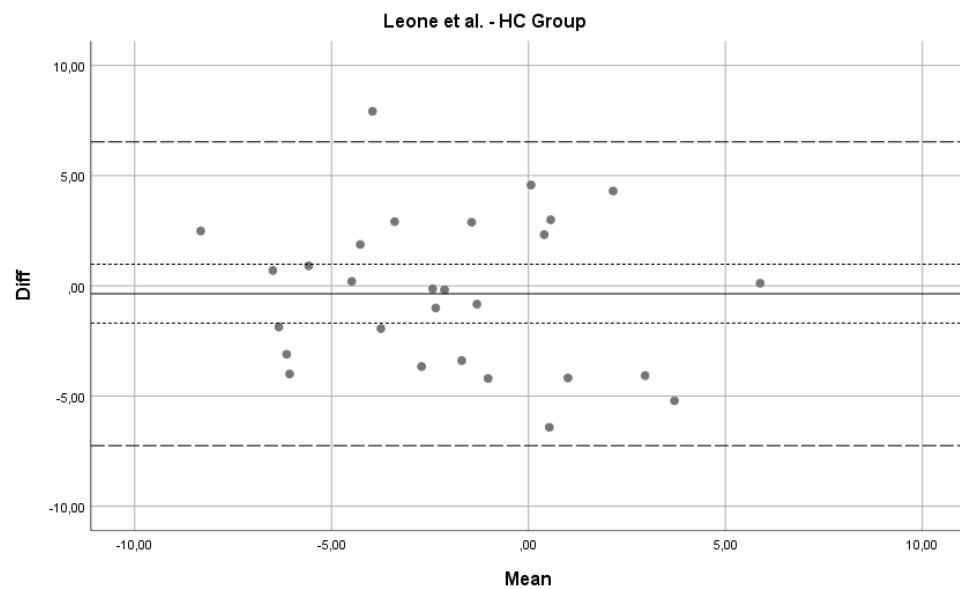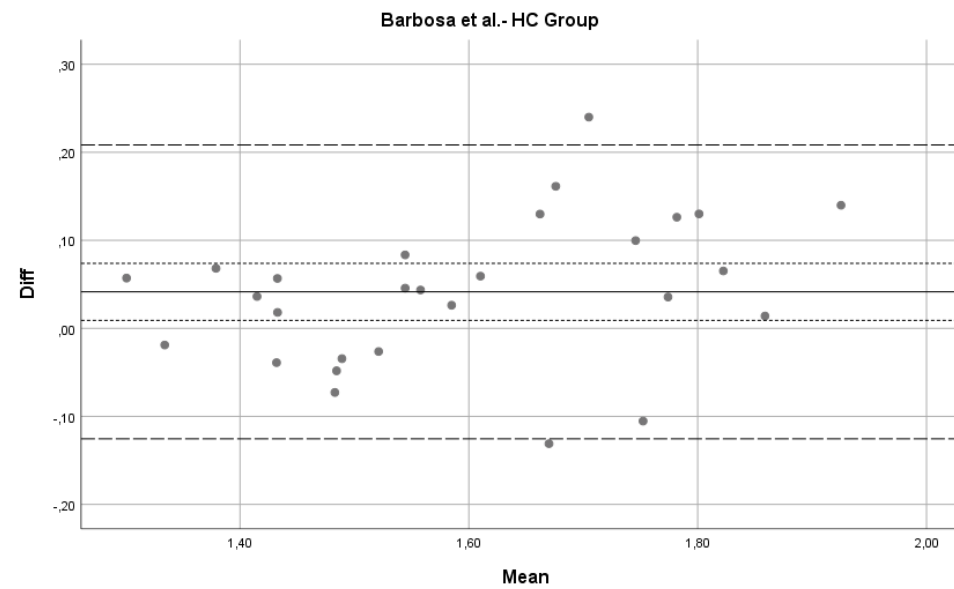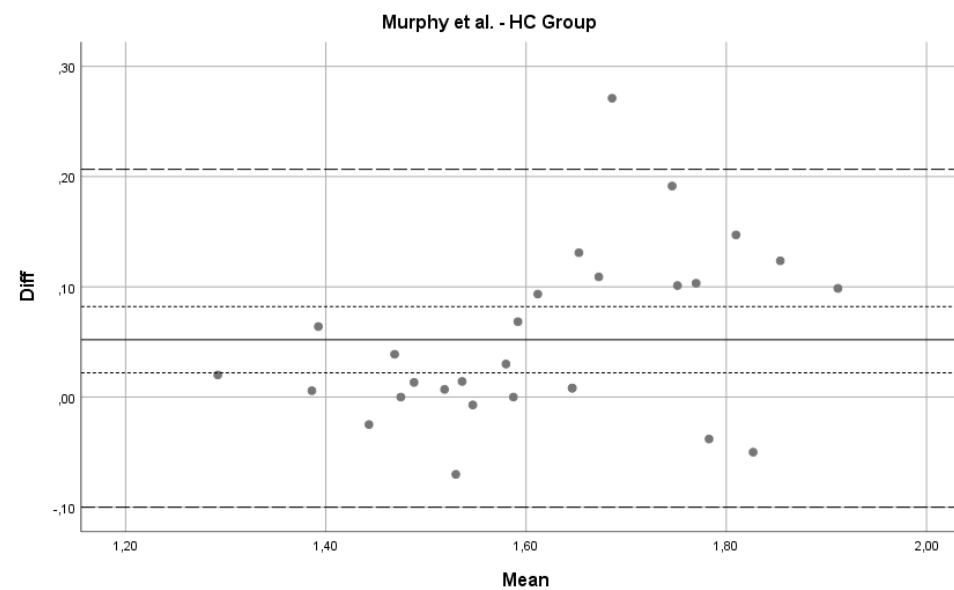

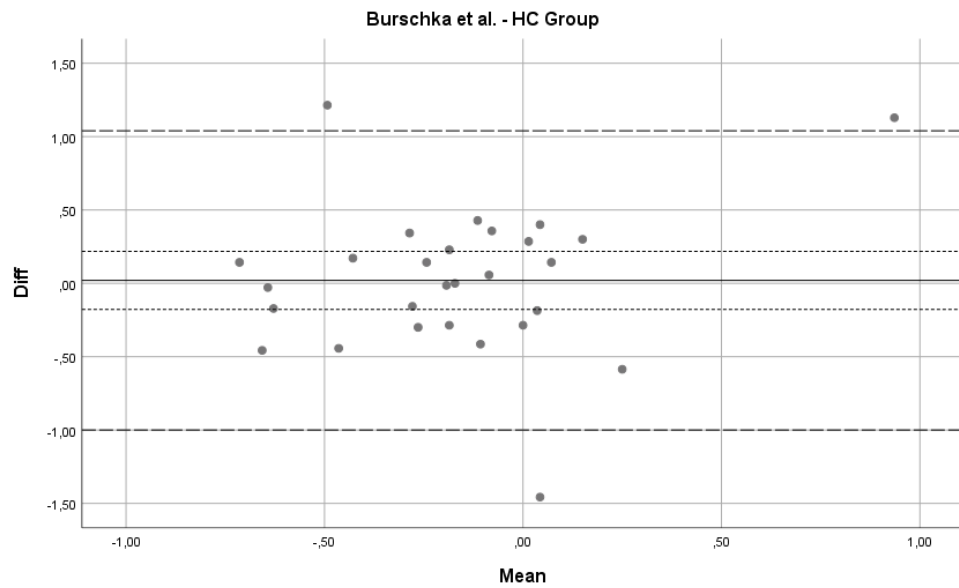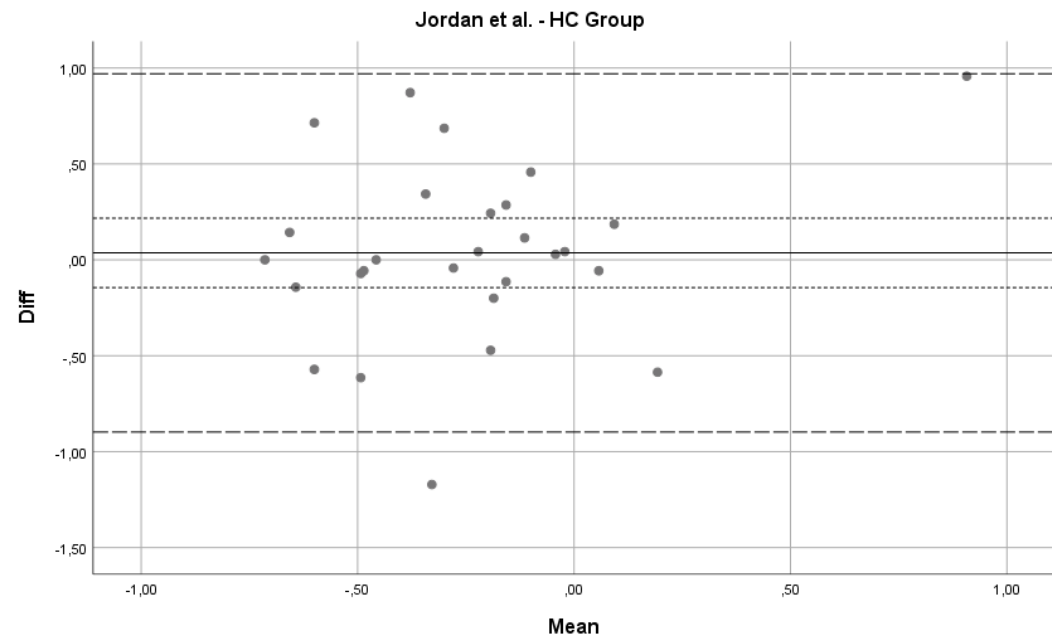

Supplement: Supplementary file 1 [file 17566367]
